# Supplementary material for: Association of weekend warrior physical activity pattern with all-cause and cardiovascular mortality among US adults with metabolic dysfunction-associated steatotic liver disease: findings from NHANES 2007-2018
Source: Research Square preprint supplement (doi:10.21203/rs.3.rs-6524632/v1), 2025-05-13
Supplement: Supplementary file 1 [file 4431bfd6b5eac298b5bed02a.docx]

**Table S1**. Threshold effects analysis of the association of total PA duration with all-cause mortality in the MASLD population.

|  | **HR (95% CI)** | **p** | **p for interaction** |
| --- | --- | --- | --- |
| **PA duratiom** |  |  | 0.022 |
| ≤150 | 0.678(0.506,0.908) | **0.009** |  |
| >150 | 0.937(0.858,1.024) | 0.151 |  |

**Table S2**. Threshold effects analysis of the association of total PA frequency with all-cause mortality in the MASLD population.

|  | **HR (95% CI)** | **p** | **p for interaction** |
| --- | --- | --- | --- |
| **PA frequency** |  |  | 0.004 |
| ≤3 | 0.838(0.741,0.948) | **0.005** |  |
| >3 | 1.047(0.966,1.135) | 0.259 |  |

**Table S3**. Threshold effects analysis of the association of total PA frequency with CVD-cause mortality in the MASLD population.

|  | **HR (95% CI)** | **p** | **p for interaction** |
| --- | --- | --- | --- |
| **PA frequency** |  |  | 0.02 |
| ≤2 | 0.635(0.418,0.963) | 0.033 |  |
| >2 | 1.066(0.971,1.170) | 0.182 |  |
